# Supplementary material for: Size fractionation of graphene oxide sheets assisted by circular flow and their graphene aerogels with size-dependent adsorption
Source: Royal Society of Chemistry journal article supplement (doi:10.1039/c6ra16363g), 2016-01-01
Supplement: c6ra16363g1.pdf [file c6ra16363g1.pdf]

## Electronic Supplementary Information (ESI)

# Size Fractionation of Graphene Oxide Sheets Assisted by Circular Flow and their Graphene Aerogels with Size-dependent Adsorption

*Shiyu Zhang, Yajun Li, Jun Sun, Jianjun Wang, Chuanxiang Qin and Lixing Dai\**

College of Chemistry, Chemical Engineering and Materials Science, Soochow University, Suzhou, Jiangsu, 215123, People's Republic of China.

Table of contents:

1. Supporting Tables (S1)
2. Supporting Figures (S1–S6)

**Table S1** Experimental parameters of size fractionation of CGO.

| Fractionation tube (mm) | Silicon sheet (anode) (mm)                         | Cone groove (mm)                        | Needle tubing (cathode)(mm) |
|-------------------------|----------------------------------------------------|-----------------------------------------|-----------------------------|
| Φ10×600                 | 8×35                                               | Φ9×20                                   | Φ1.2×32                     |
| Electric current (mA)   | C <sub>H</sub> <sup>+</sup> (mol L <sup>-1</sup> ) | C <sub>CGO</sub> (mol L <sup>-1</sup> ) | Fractionation time (h)      |
| 0.95±0.05               | 0.1-0.5                                            | 0.2-2                                   | 3.5-4.5                     |

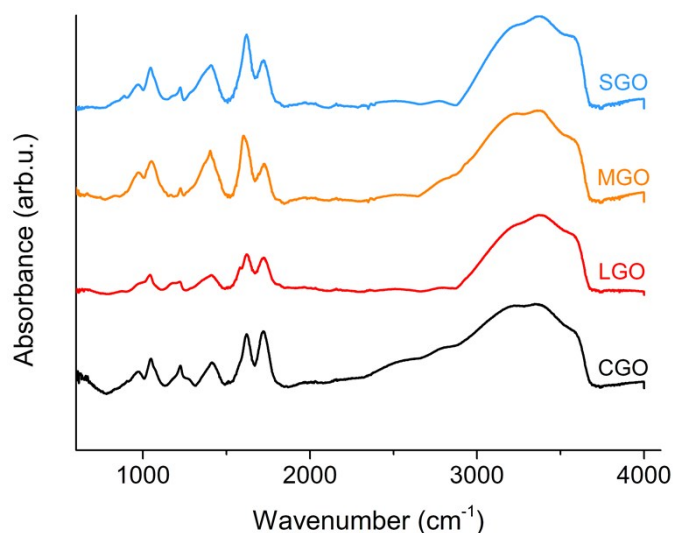

**Fig. S1** FTIR spectra of CGO, LGO, MGO and SGO sheets. The following functional groups were identified in all GO specimens: O-H stretching vibrations ( $3420\text{ cm}^{-1}$ ), C=O stretching vibration ( $1720\text{-}1740\text{ cm}^{-1}$ ), C=C from aromatic  $\text{sp}^2$  CC bonds ( $1590\text{-}1620\text{ cm}^{-1}$ ), and C-O vibrations ( $1250\text{ cm}^{-1}$ ).

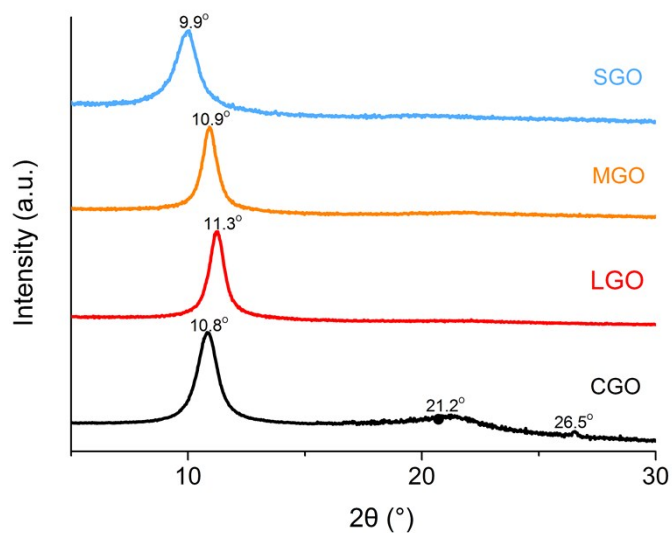

**Fig. S2** XRD patterns of CGO, LGO, MGO and SGO specimens. There are four XRD diffraction peaks at  $2\theta = 10.8^\circ$ ,  $11.3^\circ$ ,  $10.9^\circ$  and  $9.9^\circ$ , corresponding to the WAXD patterns of CGO, LGO, MGO and SGO samples respectively.

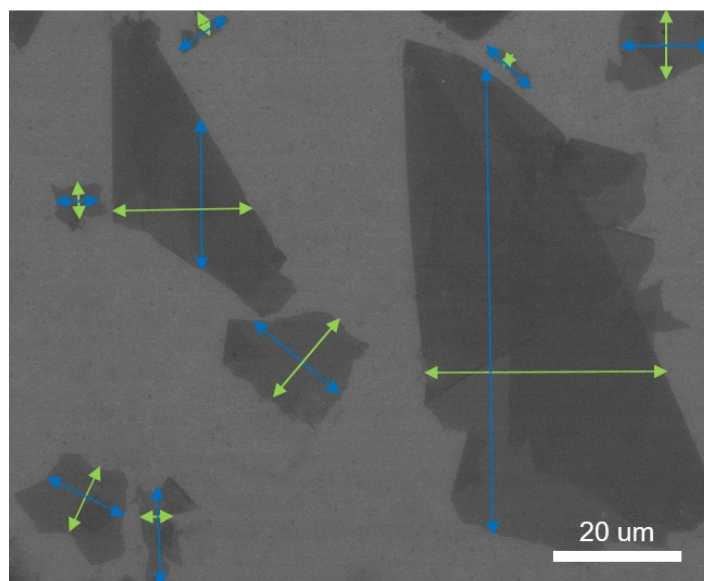

**Fig. S3** Details for determination of the size of a GO sheet with irregular shape. The size of every sheet is defined as a square root of area value, which is obtained by largest (blue line) multiplying with the smallest (green line) transverse widths. According to the monolayer structure of graphene, the weight of a graphene sheet is directly proportional to its area value. Hence, the weight percentage of GO size distribution is relative to its area percentage.

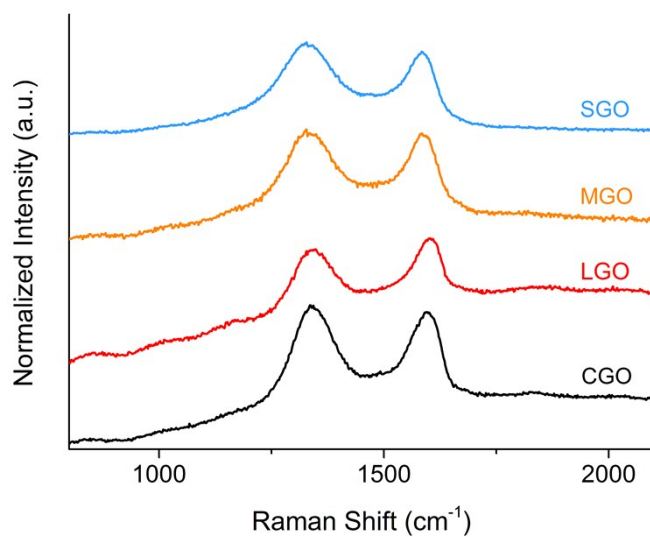

**Fig. S4** Raman spectra of CGO, LGO, MGO and SGO sheets. Two usual bands were detected at GO sheets: the G-band near 1590 cm<sup>-1</sup> corresponds to the Raman-active E<sub>2g</sub> mode of graphite due to sp<sup>2</sup> hybridized carbons and the D-band around 1350 cm<sup>-1</sup> is attributed to either sp<sup>3</sup> hybridized carbons or the structural defect sites of the sp<sup>2</sup> hybridized carbon network.

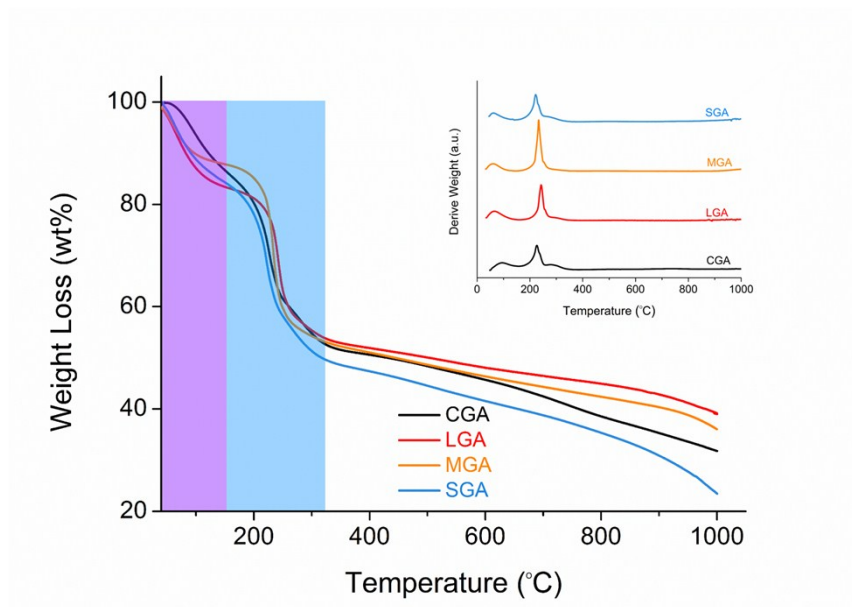

**Fig. S5** TGA analysis of CGA, LGA, MGA and SGA, respectively. The inset is DTG analysis of these different aerogels.

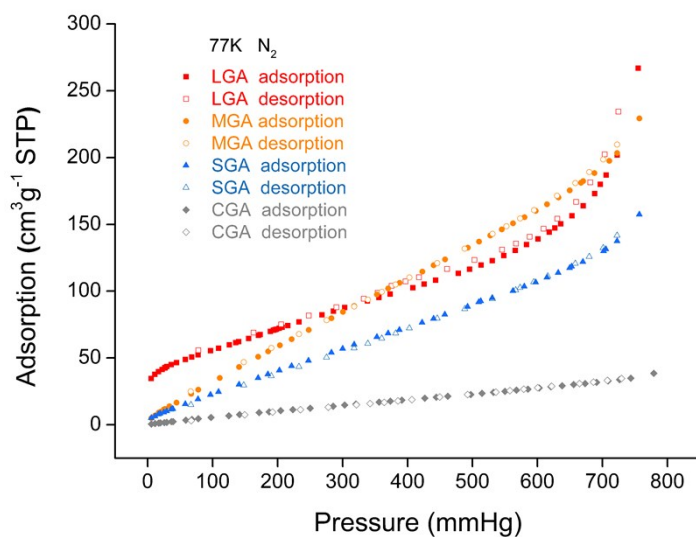

**Fig. S6** Nitrogen adsorption–desorption isotherms of CGA, LGA, MGA and SGA, respectively. The BET surface areas ( $\text{m}^2 \text{g}^{-1}$ ) of different graphene aerogels decreases in the following sequence: LGA (86.4) > MGA (84.3) > SGA (56.3) > CGA (2.4).
